# Supplementary material for: The Design of 3D-Printed Polylactic Acid–Bioglass Composite Scaffold: A Potential Implant Material for Bone Tissue Engineering
Source: MDPI journal article supplement (doi:10.3390/molecules27217214), 2022-10-25
Supplement: s1 [file s1]

## Electronic Supplementary Information (ESI)

*Article*

*Design of 3D printed polylactic acid - bioglass composite scaffold: A potential implant material for bone tissue engineering*

**Sahar Sultan<sup>1</sup>, NebuThomas<sup>2</sup>, Mekha Varghese<sup>2</sup>, Yogesh Dalvi<sup>3</sup>, Shilpa Joy<sup>4</sup>, Stephen Hall<sup>5</sup> and Aji Mathew<sup>1,\*</sup>**

SI-1: Movie showing the 3D structure of PLA-Bioglass Uniform Cube scaffold

[https://www.dropbox.com/s/szxjb4x1q3dnnb9/SI-1\\_BioGlas\\_CubeUnif\\_8mu\\_3Dmovie.mpg?dl=0](https://www.dropbox.com/s/szxjb4x1q3dnnb9/SI-1_BioGlas_CubeUnif_8mu_3Dmovie.mpg?dl=0)

SI-2: Movie showing the slices of 3D printed PLA-Bioglass Uniform cube scaffold in the y-Z plane

[https://www.dropbox.com/s/9sntm3c8qf4s4ke/SI-2\\_BioGlas\\_CubeUnif\\_8mu\\_YZ-slice\\_movie.mov?dl=0](https://www.dropbox.com/s/9sntm3c8qf4s4ke/SI-2_BioGlas_CubeUnif_8mu_YZ-slice_movie.mov?dl=0)
